# Supplementary material
Source: PubMed Central journal article supplement (PMC2933382)
Supplement: NIHMS229921-supplement-2_si_005.pdf [file NIHMS229921-supplement-2_si_005.pdf]

**Supplementary Table 1.** Levels of over-expressed AeSCP-2s in transfected Aag-2 cells

| expression | $\mu\text{g/well}$ | S.D. (N=3) | <i>P</i> (t test) |
|------------|--------------------|------------|-------------------|
| wt         | 0.0010             | 0.0003     |                   |
| Y30A       | 0.0007             | 0.0003     | 0.4306            |
| F32A       | 0.0010             | 0.0007     | 0.8862            |
| W44E       | 0.0015             | 0.0004     | 0.1484            |
| M90L       | 0.0015             | 0.0007     | 0.3371            |
| F105A      | 0.0011             | 0.0003     | 0.5410            |
| wt/EGFP    | 0.0014             | 0.0008     | 0.3773            |
